# Supplementary material for: Differential gene expression and physiological changes during acute or persistent plant virus interactions may contribute to viral symptom differences
Source: PLoS One. 2019 May 3;14(5):e0216618. doi: 10.1371/journal.pone.0216618 (PMC6499435; doi:10.1371/journal.pone.0216618)
Supplement: S11 Table — (XLSX) [file pone.0216618.s021.xlsx]

## Sheet: S11 Table
S11 Table
List of primers which were used to amplify part of the indicated endogenous gene from N. benthamiana.
Endogenous gene	Sequence (5'-3')	Sequence	Reference	method
		region, size in bp
Rubisco	F: CTTTCCTCTGCAGCAGTTGCC	X02353.1	Havelda et al., 2008	northern
	R: GCACTTGACGCACGTTGTCG	1063-1943, 881 bp
GAPDH	F: TCTCAAATATGACTCCACCC	AB937979.1	Havelda et al., 2008	northern
	R: ACCCCATTCATTGTCATACC	330-1152, 823 bp
CP29	F: CTGGACGGGAGTCTCGTCGGCG	NM_001325178.1	Havelda et al., 2008	northern
	R: GCAAAGCCCAAGAAGGCAACC	181-753, 572 bp
PR1	F: TTCCTGTCTCTACACTTCTC	X06361.1	This work	northern
	R: TCAGATCATACATCAAGCTG	474-1156, 680bp
PR-Q	F: GACAACTACGATTGCAGAAG	M29868.1	This work	northern
	R: GCAATAGCTTCATCACTCAA	1-959, 959 bp
SAR	F: CTACAATAACCCAAGCAATG	XM_016646007.1	This work	northern
	R: GTAGTAGAATCTATGCAATG	116-533, 404 bp
GST	F: GGCAGAAGTGAAGTTGCTTGG	AY206006.1	Havelda et al., 2008	northern
	R: CCAATTGTAGTTATGCACTTAACATC	3-326, 324 bp
LDH	F: GGAAGTTGTGCAGTGTGCATATG	EH616895.1	This work	northern
	R: TACCACAGCGCACTAGCAGGCAGC	30-540, 511 bp
PDF1	F: ACCTTCTCACGGAACACCTTCGC	EB425713.1	This work	northern
	R: AACAGGACATAGCAAGAAACTG	1-897, 897 bp
PAO	F: GTGAGAAGCGCATCAATAAG	XM_016628974.1	This work	northern
	R: TGACCATCCATGATATGAAC	1-600, 600 bp
CESA	F: TGGAGAAGCAGAGAATGAGC	XM_016660141.1	This work	qRT-PCR
	R: GCACTCCAAGCCACAAATCC	3592-3718, 127 bp
CWINV	F: CTCTGTAGTGGAAAGTTTTGG	XM_016656491.1	This work	qRT-PCR
	R: GCTTCTTTGCCATTGTTGAAG	1666-1782, 117 bp
BZL4	F: GGAAACACCGTCTGAATAGAAGC	AY045572.1	This work	northern
	R: TCAAAATTTAAATAAGCCTGAAG	5-563, 559 bp
NAP	F: ATTGCTCCGAGGAGCTTCCTCCTGG	EB425871.1	This work	northern
	R: CATTTCCAATAGATGAGATAGTG	32-660, 629 bp
ZFP11	F: CAATATTTCATTCTTTCATCTTCC	FG635822.1	This work	northern
	R: AACTCCAGAAATTATACTTTCTAG	5-665, 661 bp
WRKY70	F: CTTCACATGGAGTCTCCGTTGCC	EH618950.1	This work	northern
	R: TCGCCGCCATATGGCCGTCGGAG	11-864, 854 bp
LRR-transmembrane kinase	F: GACTTGGAACTATTGAGGTACC	BP529088.1	This work	northern
	R: CTTGAAATTGTAGTCTGATTATA	5-436, 432 bp
TMLK1	F: GTCAAAGAATGTTCTTGTCGATG	DW002774.1	This work	northern
	R: GGAAAGCTATAACCATTTAGCC	1-610, 610 bp
AGO4A	F: TCCTCCTTGGTGGAGAAGTCTAG	DQ321490.1	Fátyol et al, 2016	northern
	R: TTAACAGAAGAACATGGAACTAGAAACAT	1228-2736, 1509bp
